# Supplementary material
Source: Springer Nature journal article supplement (https://www.springermedizin.de/resource/supplementary/12879_2012_2185_MOESM2_ESM.pdf/9443768)

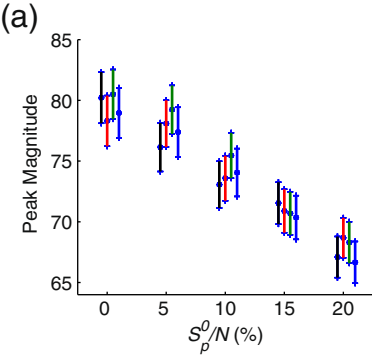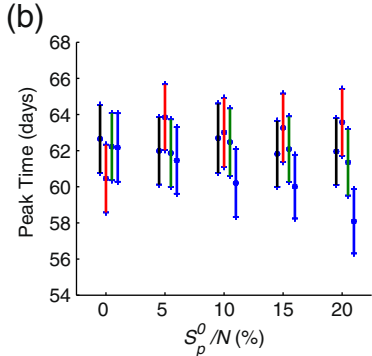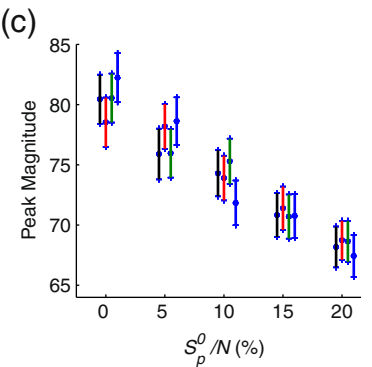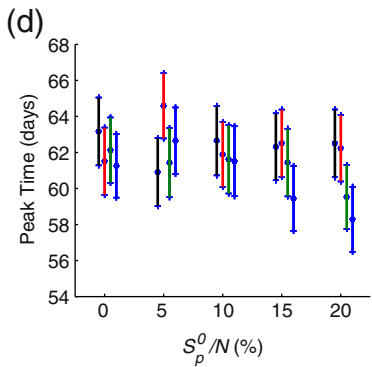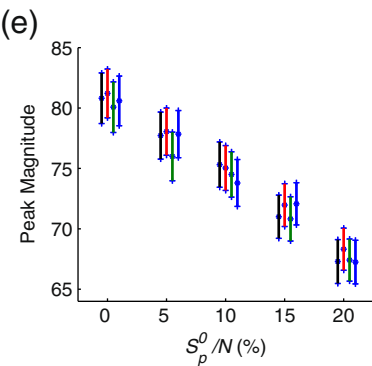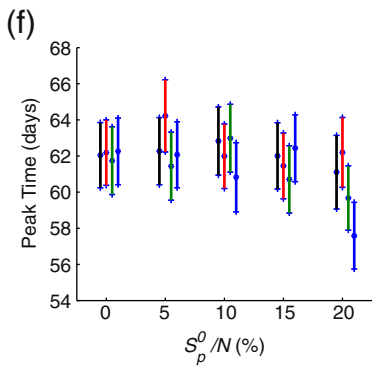

Supplement: MOESM2 [file 9443768]
